# Supplementary material for: Reactions of noble-metal oxides in ionic liquids near room temperature
Source: Royal Society of Chemistry journal article supplement (doi:10.1039/d3ra00892d), 2023-01-01
Supplement: d3ra00892d1.pdf [file d3ra00892d1.pdf]

## SUPPORTING INFORMATION

### Reactions of Noble-Metal Oxides in Ionic Liquids Near Room Temperature

Mareike Liebertseder,<sup>1</sup> Carsten Donsbach,<sup>1</sup> and Claus Feldmann<sup>1\*</sup>

<sup>1</sup> *Dr. M. Liebertseder, Dr. C. Donsbach, Prof. Dr. C. Feldmann  
Institute for Inorganic Chemistry, Karlsruhe Institute of Technology (KIT)  
Engesserstrasse 15, D-76131 Karlsruhe, Germany  
claus.feldmann@kit.edu*

#### **Content**

- 1. Analytical Equipment**
- 2. Structural Details and Unit Cells**
- 3. IR spectroscopy**

## 1. Analytical Equipment

**Single-crystal X-ray structure analysis.** For single crystal structure analysis, suitable crystals of  $[(C_8H_{14}N_2)_2Hg][CuCl_3]$  were selected, covered by inert-oil (perfluoropolyalkylether, ABCR), and placed on a plastic loop. Data collection was performed at 213 K on an IPDS II image-plate diffractometer (Stoe, Darmstadt) using Mo- $K_\alpha$  radiation ( $\lambda = 0.71073 \text{ \AA}$ , graphite monochromator). Suitable crystals of  $(C_6H_{10}N_2)AuCl$  and  $(C_6H_{10}N_2)AgI$  were selected and the data collection was performed at 180 K on an Stoe StadiVari Diffractometer with Euler geometry (Stoe, Darmstadt) using Mo- $K_\alpha$  radiation ( $\lambda = 0.71073 \text{ \AA}$ , graphite monochromator). Data collection for the compounds  $(C_8H_{14}N_2)CuCl$ ,  $[(C_8H_{14}N_2)_2Hg][AgCl_3]$ , and  $[EMIm][Ag_2I_2Cl]$  were performed at 180 K on an Stoe StadiVari diffractometer with Euler geometry (Stoe, Darmstadt) using Ga- $K\alpha$  radiation ( $\lambda = 1.34013 \text{ \AA}$ , graded multilayer mirror as the monochromator). Data reduction and multi-scan absorption correction were conducted by the X-AREA software package (version 1.75).<sup>S1</sup> Space group determination based on systematic absence of reflections was performed by XPREP. Using Olex2,<sup>S2</sup> the structure was solved with the ShelXS<sup>S3</sup> structure solution program using Direct Methods and refined with the ShelXL<sup>S4</sup> refinement package using least-squares minimization. All non-hydrogen atoms were refined anisotropically. Detailed information on crystal data and structure refinement are listed in Table 1. DIAMOND was used for all illustrations.<sup>S5</sup> Further details of the crystal structure investigation may be obtained from the joint CCDC/FIZ Karlsruhe deposition service on quoting the depository number CSD-No. 2104796-2104800.

**Fourier-transform infrared (FT-IR) spectroscopy.** Spectra of the title compounds were recorded on a Bruker Vertex 70 FT-IR spectrometer. The samples were measured as pellets in KBr. Thus, 300 mg of dried KBr and 1 mg of the sample were carefully pestled together and pressed to a thin pellet.

**Thermogravimetry (TG)** was carried out on a Netzsch STA 449 F3 Jupiter device applying  $\alpha\text{-Al}_2\text{O}_3$  as crucible material and reference. Buoyancy effects were corrected by baseline subtraction of a blank measurement. The samples were measured under dried nitrogen up to 1000 °C with a heating rate of 5 K/min. The Netzsch software PROTEUS Thermal Analysis (Version 5.2.1) was used for graphical evaluation.

**Excitation and emission spectra** were recorded using a photoluminescence spectrometer Horiba Jobin Yvon Spex Fluorolog 3, equipped with a 450 W Xenon lamp, double

monochromator for excitation and emission, an integrating sphere (Ulbricht sphere) and a photomultiplier as the detector. The determination of the quantum yield was performed according to *Friend et al.*<sup>S6</sup> First of all, the diffuse reflection of the sample was determined under excitation conditions. Thereafter, the emission was measured at this excitation wavelength. Integration over the reflected and emitted photons by use of the Ulbricht sphere results in the absolute quantum yield. Corrections were made regarding the spectral power of the excitation source, the reflection behavior of the Ulbricht sphere and the sensitivity of the detector.

## 2. Structural Details and Unit Cells

Details of the single-crystal structure analysis are summarized in Tables S1 and S2. The unit cells of the title compounds are displayed in Figures S1-S6.

**Table S1.** Crystallographic data and refinement details of the title compounds **1-3**.

| Data                              | (C <sub>8</sub> H <sub>14</sub> N <sub>2</sub> )CuCl                                                                                   | (C <sub>8</sub> H <sub>14</sub> N <sub>2</sub> )AgI                                                                                    | (C <sub>6</sub> H <sub>10</sub> N <sub>2</sub> )AuCl                                                                                     |
|-----------------------------------|----------------------------------------------------------------------------------------------------------------------------------------|----------------------------------------------------------------------------------------------------------------------------------------|------------------------------------------------------------------------------------------------------------------------------------------|
| Empirical formula                 | C <sub>8</sub> ClCuH <sub>14</sub> N <sub>2</sub>                                                                                      | AgC <sub>8</sub> H <sub>14</sub> IN <sub>2</sub>                                                                                       | AuC <sub>6</sub> ClH <sub>10</sub> N <sub>2</sub>                                                                                        |
| Formula weight                    | 237.20 g mol <sup>-1</sup>                                                                                                             | 372.98 g mol <sup>-1</sup>                                                                                                             | 342.58 g mol <sup>-1</sup>                                                                                                               |
| Crystal system                    | orthorhombic                                                                                                                           | monoclinic                                                                                                                             | triclinic                                                                                                                                |
| Space group                       | <i>P</i> 2 <sub>1</sub> 2 <sub>1</sub> 2 <sub>1</sub>                                                                                  | <i>C</i> c                                                                                                                             | <i>P</i> $\bar{1}$                                                                                                                       |
| Lattice parameters                | <i>a</i> = 818.01(5) pm<br><i>b</i> = 1084.2(1) pm<br><i>c</i> = 1168.5(1) pm <sup>o</sup>                                             | <i>a</i> = 1547.4(1) pm<br><i>b</i> = 658.5(1) pm<br><i>c</i> = 1237.4(1) pm<br>$\beta$ = 106.70(1)                                    | <i>a</i> = 884.28(8)<br><i>b</i> = 930.20(8)<br><i>c</i> = 1068.4(1)<br>$\alpha$ = 89.57(1)<br>$\beta$ = 87.39(1)<br>$\gamma$ = 82.12(7) |
| Cell volume                       | <i>V</i> = 1036.3(1) × 10 <sup>6</sup> pm <sup>3</sup>                                                                                 | <i>V</i> = 1207.6(1) × 10 <sup>6</sup> pm <sup>3</sup>                                                                                 | <i>V</i> = 869.60(13) × 10 <sup>6</sup> pm <sup>3</sup>                                                                                  |
| Formula units per cell            | <i>Z</i> = 4                                                                                                                           | <i>Z</i> = 4                                                                                                                           | <i>Z</i> = 4                                                                                                                             |
| Calculated density                | $\rho$ = 1.520 g cm <sup>-3</sup>                                                                                                      | $\rho$ = 2.051 g cm <sup>-3</sup>                                                                                                      | $\rho$ = 2.617 g cm <sup>-3</sup>                                                                                                        |
| Measurement limits                | -8 ≤ <i>h</i> ≤ 10, -13 ≤ <i>k</i> ≤ 11,<br>-13 ≤ <i>l</i> ≤ 14                                                                        | -19 ≤ <i>h</i> ≤ 19, -8 ≤ <i>k</i> ≤ 8,<br>-15 ≤ <i>l</i> ≤ 15                                                                         | -11 ≤ <i>h</i> ≤ 11, -13 ≤ <i>k</i> ≤ 13,<br>-15 ≤ <i>l</i> ≤ 14                                                                         |
| 2 Theta range for data collection | 9.68 to 114.91°                                                                                                                        | 10.39 to 118.49°                                                                                                                       | 3.816 to 49.99°                                                                                                                          |
| Wavelength                        | $\lambda$ (Ga-K $\alpha$ ) = 1.34013 Å                                                                                                 | $\lambda$ (Ga-K $\alpha$ ) = 1.34013 Å                                                                                                 | $\lambda$ (Mo-K $\alpha$ ) = 0.71073 Å                                                                                                   |
| Linear absorption coefficient     | $\mu$ = 12.658 mm <sup>-1</sup>                                                                                                        | $\mu$ = 22.204 mm <sup>-1</sup>                                                                                                        | $\mu$ = 17.154 mm <sup>-1</sup>                                                                                                          |
| Number of reflections             | 9949 (2132 independent)                                                                                                                | 5771 (1693 independent)                                                                                                                | 6605 (3046 independent)                                                                                                                  |
| Refinement method                 | Full-matrix least-squares<br>on F <sup>2</sup>                                                                                         | Full-matrix least-squares<br>on F <sup>2</sup>                                                                                         | Full-matrix least-squares<br>on F <sup>2</sup>                                                                                           |
| Merging                           | R <sub>int</sub> = 0.0747                                                                                                              | R <sub>int</sub> = 0.0418                                                                                                              | R <sub>int</sub> = 0.0305                                                                                                                |
| Number of parameters              | 112                                                                                                                                    | 112                                                                                                                                    | 185                                                                                                                                      |
| Residual electron density         | 0.48 to -0.43 e <sup>-</sup> 10 <sup>-6</sup> pm <sup>-3</sup><br>R1 (I ≥ 2 $\sigma$ <sub>i</sub> ) = 0.0454<br>R1 (all data) = 0.0610 | 2.42 to -2.70 e <sup>-</sup> 10 <sup>-6</sup> pm <sup>-3</sup><br>R1 (I ≥ 2 $\sigma$ <sub>i</sub> ) = 0.0750<br>R1 (all data) = 0.0751 | -4.30 to 3.49 e <sup>-</sup> 10 <sup>-6</sup> pm <sup>-3</sup><br>R1 (I ≥ 2 $\sigma$ <sub>i</sub> ) = 0.0494<br>R1 (all data) = 0.0521   |
| Figures of merit                  | wR2 (all data) = 0.1072                                                                                                                | wR2 (all data) = 0.1985                                                                                                                | wR2 (all data) = 0.1407                                                                                                                  |

GooF = 0.961

GooF = 1.064

GooF = 1.089

---

**Table S2.** Crystallographic data and refinement details of the title compounds 4-6.

| Data                              | [C <sub>8</sub> H <sub>14</sub> N <sub>2</sub> ] <sub>2</sub> [HgCuCl <sub>3</sub> ]                                                                                                                                                                      | [C <sub>8</sub> H <sub>14</sub> N <sub>2</sub> ] <sub>2</sub> [HgAgCl <sub>3</sub> ]                                                                                                                                                                      | [EMIm][Ag <sub>2</sub> I <sub>2</sub> Cl]                                                                                                                                                                                                                   |
|-----------------------------------|-----------------------------------------------------------------------------------------------------------------------------------------------------------------------------------------------------------------------------------------------------------|-----------------------------------------------------------------------------------------------------------------------------------------------------------------------------------------------------------------------------------------------------------|-------------------------------------------------------------------------------------------------------------------------------------------------------------------------------------------------------------------------------------------------------------|
| Empirical formula                 | C <sub>16</sub> Cl <sub>3</sub> CuH <sub>24</sub> HgN <sub>4</sub>                                                                                                                                                                                        | AgC <sub>16</sub> Cl <sub>3</sub> CuH <sub>28</sub> HgN <sub>4</sub>                                                                                                                                                                                      | AgC <sub>6</sub> ClH <sub>10</sub> I <sub>2</sub> N <sub>2</sub>                                                                                                                                                                                            |
| Formula weight                    | 646.90 g mol <sup>-1</sup>                                                                                                                                                                                                                                | 691.23 g mol <sup>-1</sup>                                                                                                                                                                                                                                | 616.16 g mol <sup>-1</sup>                                                                                                                                                                                                                                  |
| Crystal system                    | monoclinic                                                                                                                                                                                                                                                | monoclinic                                                                                                                                                                                                                                                | triclinic                                                                                                                                                                                                                                                   |
| Space group                       | <i>C2/c</i>                                                                                                                                                                                                                                               | <i>C2/c</i>                                                                                                                                                                                                                                               | <i>p</i> $\bar{1}$                                                                                                                                                                                                                                          |
| Lattice parameters                | <i>a</i> = 1458.4(3) pm<br><i>b</i> = 888.98(16) pm<br><i>c</i> = 1732.2(3)<br>$\beta$ = 103.4(1)°                                                                                                                                                        | <i>a</i> = 1420.3(1) pm<br><i>b</i> = 903.99(3) pm<br><i>c</i> = 1731.8(1) pm<br>$\beta$ = 101.1(1)                                                                                                                                                       | <i>a</i> = 690.28(5)<br><i>b</i> = 895.65(6)<br><i>c</i> = 1059.2(1)<br>$\alpha$ = 85.62(1)<br>$\beta$ = 85.23(1)<br>$\gamma$ = 85.92(1)                                                                                                                    |
| Cell volume                       | <i>V</i> = 2184.7(7) × 10 <sup>6</sup> pm <sup>3</sup>                                                                                                                                                                                                    | <i>V</i> = 2182.1(1) × 10 <sup>6</sup> pm <sup>3</sup>                                                                                                                                                                                                    | <i>V</i> = 649.27(7) × 10 <sup>6</sup> pm <sup>3</sup>                                                                                                                                                                                                      |
| Formula units per cell            | <i>Z</i> = 4                                                                                                                                                                                                                                              | <i>Z</i> = 4                                                                                                                                                                                                                                              | <i>Z</i> = 2                                                                                                                                                                                                                                                |
| Calculated density                | $\rho$ = 1.967 g cm <sup>-3</sup>                                                                                                                                                                                                                         | $\rho$ = 2.104 g cm <sup>-3</sup>                                                                                                                                                                                                                         | $\rho$ = 3.152 g cm <sup>-3</sup>                                                                                                                                                                                                                           |
| Measurement limits                | -16 ≤ <i>h</i> ≤ 16, -10 ≤ <i>k</i> ≤ 10,<br>-20 ≤ <i>l</i> ≤ 20                                                                                                                                                                                          | -10 ≤ <i>h</i> ≤ 17, -11 ≤ <i>k</i> ≤ 11,<br>-19 ≤ <i>l</i> ≤ 21                                                                                                                                                                                          | -8 ≤ <i>h</i> ≤ 9, -11 ≤ <i>k</i> ≤ 11,<br>-14 ≤ <i>l</i> ≤ 7                                                                                                                                                                                               |
| 2 Theta range for data collection | 4.83 to 48.99°                                                                                                                                                                                                                                            | 10.15 to 114.94°                                                                                                                                                                                                                                          | 3.816 to 62.764°                                                                                                                                                                                                                                            |
| Wavelength                        | $\lambda$ (Mo-K $\alpha$ ) = 0.71073 Å                                                                                                                                                                                                                    | $\lambda$ (Ga-K $\alpha$ ) = 1.34013 Å                                                                                                                                                                                                                    | $\lambda$ (Ga-K $\alpha$ ) = 1.34143 Å                                                                                                                                                                                                                      |
| Linear absorption coefficient     | $\mu$ = 8.366 mm <sup>-1</sup>                                                                                                                                                                                                                            | $\mu$ = 16.206 mm <sup>-1</sup>                                                                                                                                                                                                                           | $\mu$ = 42.308 mm <sup>-1</sup>                                                                                                                                                                                                                             |
| Number of reflections             | 12650 (1816 independent)                                                                                                                                                                                                                                  | 9679 (2261 independent)                                                                                                                                                                                                                                   | 7804 (3031 independent)                                                                                                                                                                                                                                     |
| Refinement method                 | Full-matrix least-squares<br>on <i>F</i> <sup>2</sup>                                                                                                                                                                                                     | Full-matrix least-squares<br>on <i>F</i> <sup>2</sup>                                                                                                                                                                                                     | Full-matrix least-squares<br>on <i>F</i> <sup>2</sup>                                                                                                                                                                                                       |
| Merging                           | <i>R</i> <sub>int</sub> = 0.0514                                                                                                                                                                                                                          | <i>R</i> <sub>int</sub> = 0.0227                                                                                                                                                                                                                          | <i>R</i> <sub>int</sub> = 0.0225                                                                                                                                                                                                                            |
| Number of parameters              | 117                                                                                                                                                                                                                                                       | 117                                                                                                                                                                                                                                                       | 120                                                                                                                                                                                                                                                         |
| Residual electron density         | 0.61 to -0.81 e <sup>-</sup> 10 <sup>-6</sup> pm <sup>-3</sup><br><i>R</i> <sub>1</sub> ( <i>I</i> ≥ 2 $\sigma$ <sub><i>i</i></sub> ) = 0.0252<br><i>R</i> <sub>1</sub> (all data) = 0.0355<br><i>wR</i> <sub>2</sub> (all data) = 0.0492<br>Goof = 0.832 | 1.23 to -1.88 e <sup>-</sup> 10 <sup>-6</sup> pm <sup>-3</sup><br><i>R</i> <sub>1</sub> ( <i>I</i> ≥ 2 $\sigma$ <sub><i>i</i></sub> ) = 0.0239<br><i>R</i> <sub>1</sub> (all data) = 0.0257<br><i>wR</i> <sub>2</sub> (all data) = 0.0618<br>Goof = 1.057 | -3.106 to 1.081 e <sup>-</sup> 10 <sup>-6</sup> pm <sup>-3</sup><br><i>R</i> <sub>1</sub> ( <i>I</i> ≥ 2 $\sigma$ <sub><i>i</i></sub> ) = 0.0462<br><i>R</i> <sub>1</sub> (all data) = 0.0362<br><i>wR</i> <sub>2</sub> (all data) = 0.1109<br>Goof = 1.131 |

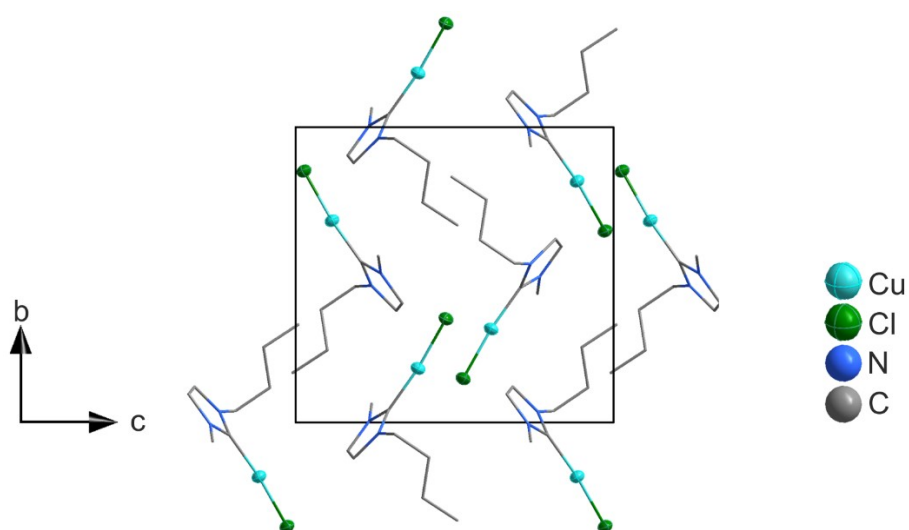**Figure S1.** Unit cell of (C<sub>8</sub>H<sub>14</sub>N<sub>2</sub>)CuCl (**1**).

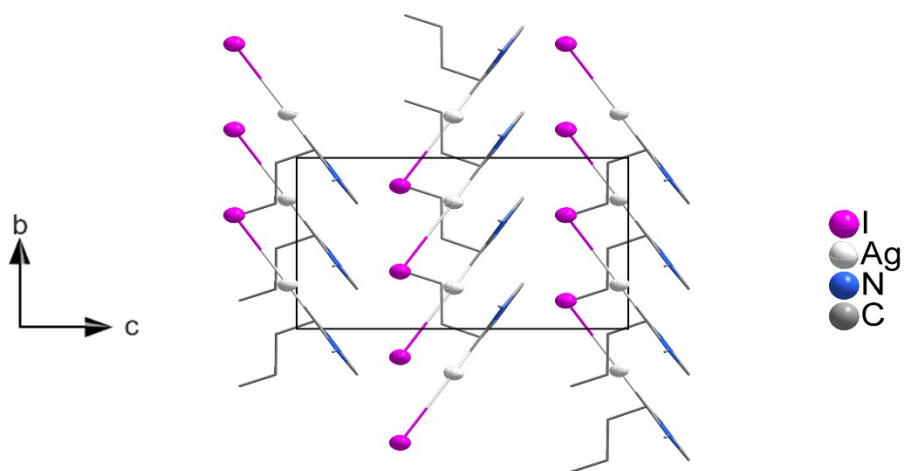

**Figure S2.** Unit cell of  $(C_8H_{14}N_2)AgI$  (**2**).

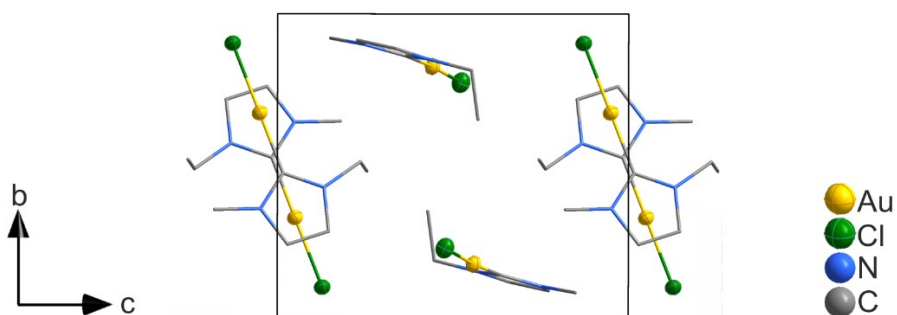

**Figure S3.** Unit cell of  $(C_6H_{10}N_2)AuCl$  (**3**).

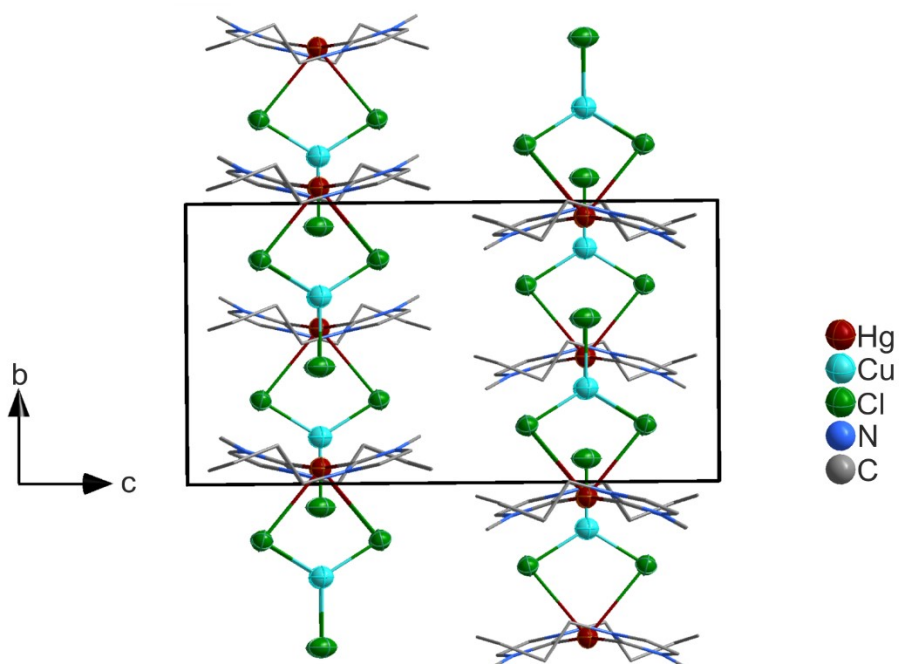

**Figure S4.** Unit cell of  $[(C_8H_{14}N_2)_2Hg][CuCl_3]$  (**4**).

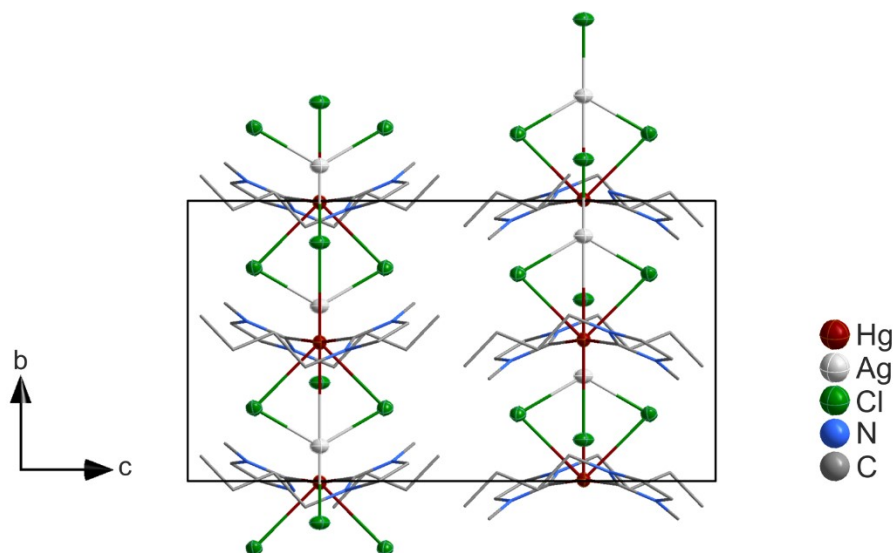

**Figure S5.** Unit cell of  $[(C_8H_{14}N_2)_2Hg][AgCl_3]$  (**5**).

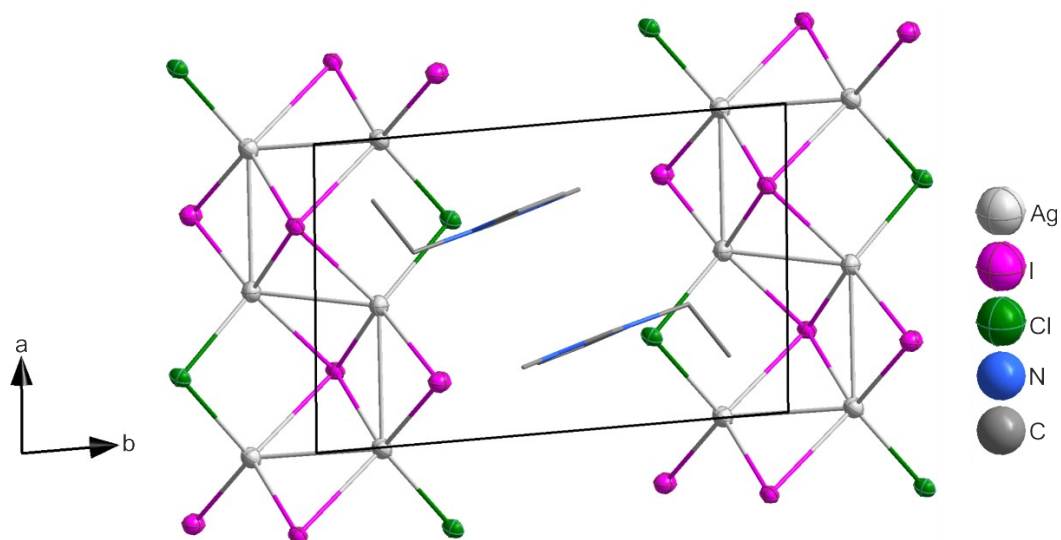

**Figure S6.** Unit cell of  $[EMIm][Ag_2I_2Cl]$  (**6**).

### 3. IR spectroscopy

FT-IR spectra of the NHC compounds **1**, **3-5** are dominated by the imidazolium cations with characteristic vibrations of  $\nu(C-H)$ :  $3300-2800\text{ cm}^{-1}$ ,  $\nu(C=N)$ :  $1650-1600\text{ cm}^{-1}$ , as well as the fingerprint area at  $1500-500\text{ cm}^{-1}$  (Figure S7).<sup>S7</sup> Moreover, the Hg–C stretching vibration at  $720-680\text{ cm}^{-1}$  is observed in the spectra of **4** and **5**.<sup>S8</sup> Similarly, the characteristic vibrations of the  $[EMIm]^+$  cation are observed for **6** (Figure S8). The absence of O–H-related vibrations at  $3600-3000\text{ cm}^{-1}$  confirms the absence of moisture.

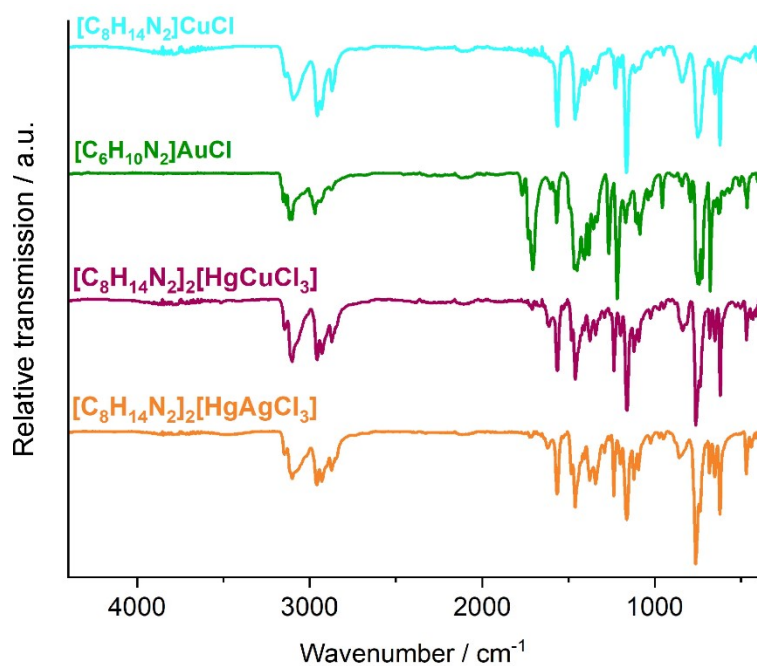

**Figure S7.** FT-IR spectra of  $(\text{C}_8\text{H}_{14}\text{N}_2)\text{CuCl}$  (**1**),  $(\text{C}_6\text{H}_{10}\text{N}_2)\text{AuCl}$  (**3**),  $[(\text{C}_8\text{H}_{14}\text{N}_2)_2\text{Hg}][\text{CuCl}_3]$  (**4**), and  $[(\text{C}_8\text{H}_{14}\text{N}_2)_2\text{Hg}][\text{AgCl}_3]$  (**5**).

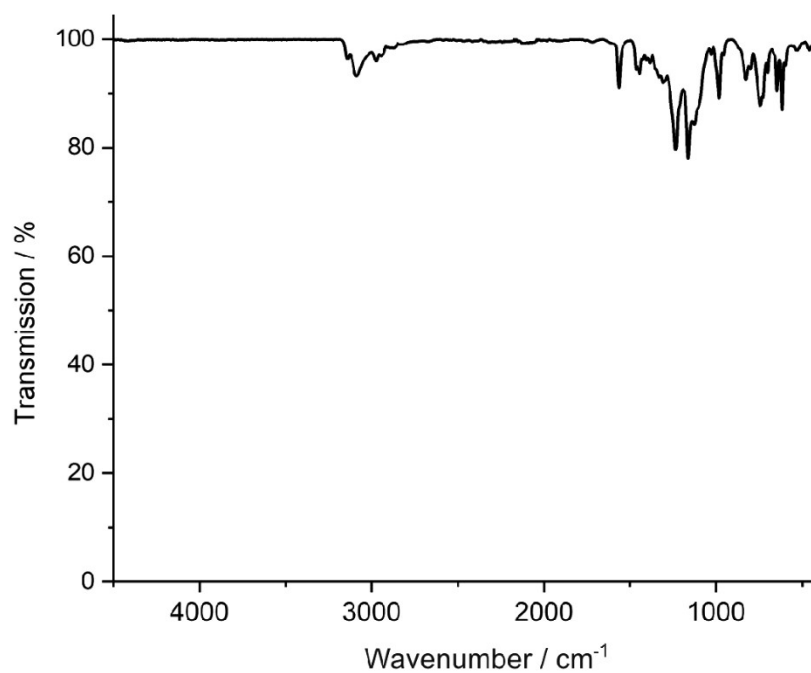

**Figure S8.** FT-IR spectrum of  $[\text{C}_6\text{H}_{11}\text{N}_2][\text{Ag}_2\text{I}_2\text{Cl}]$  (**6**).

## References

S1 X-RED32: *Data Reduction Program (Version 1.01)*, Stoe, Darmstadt 2001.



- S2 O. V. Dolomanov, L. J. Bourhis, R. J. Gildea, J. A. K. Howard and H. Puschmann, *J. Appl. Crystallogr.*, 2009, **42**, 339-341.
- S3 G. M. Sheldrick, *Acta Crystallogr. A*, 2008, **64**, 112-122.
- S4 G. M. Sheldrick, *Acta Crystallogr. C*, 2015, **71**, 3-8.
- S5 DIAMOND: *Crystal and Molecular Structure Visualization*, Crystal Impact GbR, Bonn 2016.
- S6 J. C. de Mello, H. F. Wittmann and R. H. Friend, *Adv. Mater.*, 1997, **9**, 230-232.
- S7 (a) Y. Jeon, J. Sung, C. Seo, H. Lim, H. Cheong, M. Kang, B. Moon, Y. Ouchi and D. Kim, *J. Phys. Chem. B.*, 2008, **112**, 4735-4740. (b) T. Liu, Y. Danten, J. Grondin and R. Vilar, *J. Raman Spectrosc.*, 2016, **47**, 449-456.
- S8 J. Mink, Z. Meić, M. Gál and B. Korpar-Čolig, *J. Organomet. Chem.*, 1983, **256**, 203-216.
